# Supplementary material for: Disrupting quorum sensing alters social interactions in Chromobacterium violaceum
Source: PubMed Central journal article supplement (PMC8062528; doi:10.1038/s41522-021-00211-w), 2021-04-22
Supplement: 41522_2021_211_MOESM1_ESM.pdf [file 41522_2021_211_MOESM1_ESM.pdf]

**Title: Disrupting quorum sensing alters social interactions in  
*Chromobacterium violaceum***

**Authors:** Sonia Mion<sup>1°</sup>, Nathan Carriot<sup>3°</sup>, Julien Lopez<sup>3</sup>, Laure Plener<sup>2</sup>, Annick Ortalo-Magné<sup>3</sup>, Eric Chabrière<sup>1\*</sup>, Gérald Culioli<sup>3,4\*</sup>, David Daudé<sup>2\*</sup>

<sup>1</sup>Aix Marseille University, Institut de Recherche pour le Développement, Assistance Publique - Hôpitaux de Marseille, Microbes Evolution Phylogeny and Infections, Institut Hospitalo-Universitaire-Méditerranée Infection, Marseille, France

<sup>2</sup>Gene&GreenTK, Marseille, France

<sup>3</sup>Université de Toulon, MAPIEM, EA 4323, Toulon, France

<sup>4</sup>Institut Méditerranéen de Biodiversité et d'Ecologie marine et continentale, UMR CNRS-IRD, Avignon Université, Aix-Marseille Université, Avignon, France

<sup>°</sup>These authors contributed equally to this work

**\*Corresponding authors:** [david.daude@gene-greentk.com](mailto:david.daude@gene-greentk.com); [gerald.culioli@univ-tln.fr](mailto:gerald.culioli@univ-tln.fr);  
[eric.chabriere@univ-amu.fr](mailto:eric.chabriere@univ-amu.fr)

19 **Supplementary Figures and Tables**

20

21 **Supplementary Data 1 Proteins detected by proteomic analysis, raw data, fold change and functional classification (See excel file: Supplementary\_Data\_1-**  
22 **ProteomicData)**

23

24

25 **Supplementary Table 1 Metabolome analysis filtration criteria**

| <b>Mzmine 2</b>                   |                                |                  | <b>Filtration in R</b>                            |                          |        |               |                                                                                              |                         |         |                 |          |  |
|-----------------------------------|--------------------------------|------------------|---------------------------------------------------|--------------------------|--------|---------------|----------------------------------------------------------------------------------------------|-------------------------|---------|-----------------|----------|--|
| <b>Mass detection</b>             | Mass detector                  | Centroid         | Elimination noise signal                          | signal/noise ratio       | < 3    | variables 996 |                                                                                              |                         |         |                 |          |  |
|                                   | Noise level                    | 5,00E+02         |                                                   |                          |        |               |                                                                                              |                         |         |                 |          |  |
| <b>Chromatogram builder</b>       | Min group size in # of scans   | 5                | Elimination of non stable signals                 | Coefficient of variation | > 50 % | variables 489 |                                                                                              |                         |         |                 |          |  |
|                                   | Group intensity threshold      | 5,00E+02         |                                                   |                          |        |               |                                                                                              |                         |         |                 |          |  |
|                                   | Min height                     | 5,00E+02         |                                                   |                          |        |               |                                                                                              |                         |         |                 |          |  |
|                                   | M/z tolerance (absolute)       | 0.016 / 20ppm    |                                                   |                          |        |               |                                                                                              |                         |         |                 |          |  |
| <b>chromatogram deconvolution</b> | Algorithm                      | Baseline cut-off | Manual filtration                                 |                          |        | variables 406 |                                                                                              |                         |         |                 |          |  |
|                                   | Min peak height                | 1,00E+03         |                                                   |                          |        |               |                                                                                              |                         |         |                 |          |  |
|                                   | Peak duration range (min)      | 0.005-1          |                                                   |                          |        |               |                                                                                              |                         |         |                 |          |  |
|                                   | baseline level                 | 100              |                                                   |                          |        |               |                                                                                              |                         |         |                 |          |  |
| <b>Chromatogram deisotoped</b>    | M/z tolerance (absolute)       | 0,016            | <b>Metaboanalyst analysis</b>                     |                          |        |               |                                                                                              |                         |         |                 |          |  |
|                                   | Retention time tolerance       | 0,1              |                                                   |                          |        |               |                                                                                              |                         |         |                 |          |  |
|                                   | Maximum charge                 | 3                |                                                   |                          |        |               |                                                                                              |                         |         |                 |          |  |
|                                   | Representative isotope         | Most intense     |                                                   |                          |        |               |                                                                                              |                         |         |                 |          |  |
| <b>Duplicate peak filter</b>      | Filter mode                    | NEW AVERAGE      |                                                   |                          |        |               | Data filtering                                                                               | Standard deviation (SD) |         |                 |          |  |
|                                   | M/z tolerance (absolute)       | 0.1/20ppm        |                                                   |                          |        |               | Sample Normalisation                                                                         | None                    |         |                 |          |  |
|                                   | Retention time tolerance (min) | 0,3              |                                                   |                          |        |               | Data transformation                                                                          | Log transformation      |         |                 |          |  |
| <b>Retention time normalizer</b>  | M/z tolerance (absolute)       | 0,016            |                                                   |                          |        |               | Data scaling                                                                                 | Mean centring           |         |                 |          |  |
|                                   | Retention time tolerance (min) | 0,3              |                                                   |                          |        |               | Validation du modèle                                                                         | Pemutation              | <0.01   | Validated model |          |  |
|                                   | Minimum standard intensity     | 10000            |                                                   |                          |        |               |                                                                                              | R2                      | 0,93802 |                 |          |  |
|                                   | M/z tolerance (absolute)       | 0,016            | Q2                                                | 0,84125                  |        |               |                                                                                              |                         |         |                 |          |  |
| <b>Peak list aligned</b>          | Retention time tolerance (min) | 0,5              | <b>Metabolome annotation (molecular networks)</b> |                          |        |               |                                                                                              |                         |         |                 |          |  |
|                                   | Weight for m/z                 | 1                |                                                   |                          |        |               | Precursor ion mass tolerance                                                                 | 0,02                    |         |                 |          |  |
|                                   | Weight for rt                  | 1                |                                                   |                          |        |               | Fragment ion mass tolerance                                                                  | 0,02                    |         |                 |          |  |
|                                   | Intensity tolerance            | 0,5              |                                                   |                          |        |               | Min pairs Cos                                                                                | 0,7                     |         |                 |          |  |
| <b>Gap filled</b>                 | M/z tolerance (absolute)       | 0,016            |                                                   |                          |        |               | Minimum matched fragments ions                                                               | 4                       |         |                 |          |  |
|                                   | Retention time tolerance (min) | 0,3              |                                                   |                          |        |               | <b>mzmax<br/>rtmax<br/>≥ 4 metabolites<br/>with 1 annotated node<br/>Total<br/>Annotated</b> |                         |         |                 |          |  |
|                                   | Filter mode                    | NEW AVERAGE      |                                                   |                          |        |               |                                                                                              |                         |         |                 |          |  |
| M/z tolerance (absolute)          | 0,2                            |                  |                                                   |                          |        |               |                                                                                              |                         |         |                 |          |  |
| <b>Duplicate peak filter</b>      | Retention time tolerance (min) | 0,8              |                                                   |                          |        |               |                                                                                              |                         |         |                 | BDD      |  |
|                                   | M/z tolerance (absolute)       | 0,2              |                                                   |                          |        |               |                                                                                              |                         |         |                 | Clusters |  |
| <b>Window delimitation</b>        | M/z                            | 100-1500         | Nodes                                             |                          |        |               |                                                                                              |                         |         |                 |          |  |
|                                   | rt                             | 0.5-20           |                                                   |                          |        |               |                                                                                              |                         |         |                 |          |  |

26

27

28 **Supplementary Table 2 List of VIP metabolites and proposed identification.**

| VIP N <sup>a</sup> | m/z      | RT (min) | VIP score | Molecular formula                                                          | Mass error (ppm) | m <sup>b</sup> | MS/MS fragment ions (relative abundance in %)                                                                                                                                                                                                                                                                                                                                                                                                                                                                                                                                                                                                                                                                                                                                                          | Putative annotation              | Heatmap   |              |
|--------------------|----------|----------|-----------|----------------------------------------------------------------------------|------------------|----------------|--------------------------------------------------------------------------------------------------------------------------------------------------------------------------------------------------------------------------------------------------------------------------------------------------------------------------------------------------------------------------------------------------------------------------------------------------------------------------------------------------------------------------------------------------------------------------------------------------------------------------------------------------------------------------------------------------------------------------------------------------------------------------------------------------------|----------------------------------|-----------|--------------|
|                    |          |          |           |                                                                            |                  |                |                                                                                                                                                                                                                                                                                                                                                                                                                                                                                                                                                                                                                                                                                                                                                                                                        |                                  | No enzyme | SsoPox W2631 |
| 1                  | 240.0690 | 7.66     | 3,14      | C <sub>11</sub> H <sub>14</sub> NO <sub>2</sub> S <sup>+</sup>             | -0.2             | 7.6            | 192.0656 [C <sub>10</sub> H <sub>10</sub> NO <sub>2</sub> ] <sup>+</sup> (7), 174.0544 [C <sub>10</sub> H <sub>8</sub> NO <sub>2</sub> ] <sup>+</sup> (41), 146.0598 [C <sub>9</sub> H <sub>8</sub> NO] <sup>+</sup> (67), 120.0443 [C <sub>7</sub> H <sub>8</sub> NO] <sup>+</sup> (100), 94.0652 [C <sub>6</sub> H <sub>8</sub> N] <sup>+</sup> (42)                                                                                                                                                                                                                                                                                                                                                                                                                                                 | Thiobutacin                      | -5,02     | 5,02         |
| 2                  | 386.1137 | 7.73     | 2,97      | C <sub>22</sub> H <sub>13</sub> N <sub>3</sub> O <sub>4</sub> <sup>+</sup> | -0.4             | 2.2            | 368.1026 [C <sub>22</sub> H <sub>14</sub> N <sub>3</sub> O <sub>3</sub> ] <sup>+</sup> (6), 350.0921 [C <sub>22</sub> H <sub>12</sub> N <sub>3</sub> O <sub>2</sub> ] <sup>+</sup> (50), 324.1123 [C <sub>22</sub> H <sub>10</sub> N <sub>3</sub> O] <sup>+</sup> (100), 296.1167 [C <sub>20</sub> H <sub>10</sub> N <sub>3</sub> ] <sup>+</sup> (4)                                                                                                                                                                                                                                                                                                                                                                                                                                                   | Chromopyrrolic acid              | -4,74     | 4,74         |
| 3                  | 478.2081 | 8.45     | 2,92      | C <sub>25</sub> H <sub>28</sub> N <sub>5</sub> O <sub>5</sub> <sup>+</sup> | -1.1             | 1.5            | 335.1497 [C <sub>19</sub> H <sub>18</sub> N <sub>4</sub> O <sub>2</sub> ] <sup>+</sup> (100), 268.0714 [C <sub>14</sub> H <sub>10</sub> N <sub>3</sub> O <sub>3</sub> ] <sup>+</sup> (62), 231.1242 [C <sub>12</sub> H <sub>10</sub> N <sub>4</sub> O] <sup>+</sup> (6), 212.1280 [C <sub>11</sub> H <sub>10</sub> N <sub>4</sub> O] <sup>+</sup> (4), 116.0707 [C <sub>5</sub> H <sub>10</sub> NO <sub>2</sub> ] <sup>+</sup> (16), 105.0335 [C <sub>7</sub> H <sub>10</sub> O] <sup>+</sup> (20), 89.0597 [C <sub>6</sub> H <sub>8</sub> O] <sup>+</sup> (11), 59.0495 [C <sub>3</sub> H <sub>7</sub> O] <sup>+</sup> (10)                                                                                                                                                                           | ?                                | -4,66     | 4,66         |
| 4                  | 270.1703 | 6.94     | 2,84      | C <sub>14</sub> H <sub>24</sub> NO <sub>4</sub> <sup>+</sup>               | -1.1             | 45.6           | 252.1608 [C <sub>14</sub> H <sub>22</sub> NO <sub>3</sub> ] <sup>+</sup> (2), 169.1222 [C <sub>10</sub> H <sub>17</sub> O <sub>2</sub> ] <sup>+</sup> (2), 102.0550 [C <sub>8</sub> H <sub>8</sub> NO <sub>2</sub> ] <sup>+</sup> (11), 74.0601 [C <sub>8</sub> H <sub>8</sub> NO] <sup>+</sup> (3), 56.0494 [C <sub>3</sub> H <sub>8</sub> N] <sup>+</sup> (4)                                                                                                                                                                                                                                                                                                                                                                                                                                        | 3-oxo-C10-HSL                    | 4,54      | -4,54        |
| 5                  | 272.1854 | 6.85     | 2,74      | C <sub>14</sub> H <sub>26</sub> NO <sub>4</sub> <sup>+</sup>               | 1                | 3.7            | 254.1750 [C <sub>14</sub> H <sub>24</sub> NO <sub>3</sub> ] <sup>+</sup> (in source fragmentation), 236.1639 [C <sub>14</sub> H <sub>22</sub> NO <sub>3</sub> ] <sup>+</sup> (5), 153.1266 [C <sub>10</sub> H <sub>17</sub> O] <sup>+</sup> (40), 135.1166 [C <sub>10</sub> H <sub>15</sub> ] <sup>+</sup> (100), 102.0549 [C <sub>8</sub> H <sub>8</sub> NO <sub>2</sub> ] <sup>+</sup> (84), 74.0598 [C <sub>8</sub> H <sub>8</sub> NO] <sup>+</sup> (16), 56.0494 [C <sub>3</sub> H <sub>8</sub> N] <sup>+</sup> (6)                                                                                                                                                                                                                                                                                | 3-OH-C10-HSL                     | 4,37      | -4,37        |
| 6                  | 756.3386 | 10.64    | 2,69      | C <sub>43</sub> H <sub>50</sub> NO <sub>11</sub> <sup>+</sup>              | -1.0             | 6.1            | 450.1557 [C <sub>33</sub> H <sub>38</sub> NO <sub>7</sub> ] <sup>+</sup> (24), 432.144 [C <sub>28</sub> H <sub>32</sub> NO <sub>6</sub> ] <sup>+</sup> (19), 363.1952 [C <sub>24</sub> H <sub>27</sub> O <sub>4</sub> ] <sup>+</sup> (30), 313.1068 [C <sub>18</sub> H <sub>17</sub> O <sub>3</sub> ] <sup>+</sup> (38), 283.096 [C <sub>17</sub> H <sub>15</sub> O <sub>4</sub> ] <sup>+</sup> (32), 248.0915 [C <sub>13</sub> H <sub>14</sub> NO <sub>4</sub> ] <sup>+</sup> (53), 203.0707 [C <sub>12</sub> H <sub>11</sub> O <sub>4</sub> ] <sup>+</sup> (82), 138.0551 [C <sub>7</sub> H <sub>8</sub> NO <sub>2</sub> ] <sup>+</sup> (68), 111.0443 [C <sub>6</sub> H <sub>7</sub> O <sub>2</sub> ] <sup>+</sup> (93), 89.0598 [C <sub>4</sub> H <sub>6</sub> O <sub>2</sub> ] <sup>+</sup> (100) | ?                                | 4,29      | -4,29        |
| 7                  | 343.2837 | 10.35    | 2,56      | C <sub>20</sub> H <sub>39</sub> O <sub>4</sub> <sup>+</sup>                | 1.6              | 4.6            | 325.2728 [C <sub>20</sub> H <sub>37</sub> O <sub>3</sub> ] <sup>+</sup> (23), 251.2361 [C <sub>17</sub> H <sub>31</sub> O] <sup>+</sup> (38), 233.2254 [C <sub>17</sub> H <sub>29</sub> ] <sup>+</sup> (50)                                                                                                                                                                                                                                                                                                                                                                                                                                                                                                                                                                                            | Monoacylglycerol (C17:1)         | -4,09     | 4,09         |
| 8                  | 224.1286 | 1.04     | 2,50      | C <sub>12</sub> H <sub>18</sub> NO <sub>3</sub> <sup>+</sup>               | 0.2              | 8.8            | n.f. <sup>e</sup>                                                                                                                                                                                                                                                                                                                                                                                                                                                                                                                                                                                                                                                                                                                                                                                      | Deacetylanisomycin               | 3,99      | -3,99        |
| 9                  | 280.1544 | 5.86     | 2,50      | C <sub>15</sub> H <sub>22</sub> NO <sub>4</sub> <sup>+</sup>               | 0.7              | -2.3           | 224.1276 [C <sub>15</sub> H <sub>20</sub> NO <sub>3</sub> ] <sup>+</sup> (8), 206.1174 [C <sub>13</sub> H <sub>14</sub> NO <sub>2</sub> ] <sup>+</sup> (36), 188.1067 [C <sub>12</sub> H <sub>14</sub> NO] <sup>+</sup> (8), 159.0807 [C <sub>11</sub> H <sub>11</sub> O] <sup>+</sup> (9), 121.0648 [C <sub>8</sub> H <sub>6</sub> O] <sup>+</sup> (100)                                                                                                                                                                                                                                                                                                                                                                                                                                              | Anisomycin propionate derivative | 3,99      | -3,99        |
| 10                 | 286.2012 | 7.38     | 2,40      | C <sub>15</sub> H <sub>28</sub> NO <sub>4</sub> <sup>+</sup>               | 0.1              | 6.9            | 268.1907 [C <sub>15</sub> H <sub>26</sub> NO <sub>3</sub> ] <sup>+</sup> (in source fragmentation), 250.1772 [C <sub>15</sub> H <sub>24</sub> NO <sub>3</sub> ] <sup>+</sup> (3), 167.1418 [C <sub>11</sub> H <sub>16</sub> O] <sup>+</sup> (17), 149.1325 [C <sub>11</sub> H <sub>17</sub> ] <sup>+</sup> (69), 102.0549 [C <sub>8</sub> H <sub>8</sub> NO <sub>2</sub> ] <sup>+</sup> (100), 74.0601 [C <sub>3</sub> H <sub>8</sub> NO] <sup>+</sup> (17), 56.0491 [C <sub>3</sub> H <sub>8</sub> N] <sup>+</sup> (3)                                                                                                                                                                                                                                                                                | 3-OH-C11-HSL                     | 3,83      | -3,83        |
| 11                 | 292.1528 | 6.98     | 2,34      | C <sub>16</sub> H <sub>22</sub> NO <sub>4</sub> <sup>+</sup>               | 5.3              | 16.2           | n.f.                                                                                                                                                                                                                                                                                                                                                                                                                                                                                                                                                                                                                                                                                                                                                                                                   | ?                                | 3,73      | -3,73        |
| 12                 | 596.2133 | 8.56     | 2,29      | C <sub>31</sub> H <sub>34</sub> NO <sub>11</sub> <sup>+</sup>              | -1.2             | 7.1            | 450.1557 [C <sub>28</sub> H <sub>32</sub> NO <sub>7</sub> ] <sup>+</sup> (17), 432.144 [C <sub>28</sub> H <sub>32</sub> NO <sub>6</sub> ] <sup>+</sup> (17), 363.1952 [C <sub>24</sub> H <sub>27</sub> O <sub>4</sub> ] <sup>+</sup> (30), 313.1066 [C <sub>18</sub> H <sub>17</sub> O <sub>3</sub> ] <sup>+</sup> (26), 283.096 [C <sub>17</sub> H <sub>15</sub> O <sub>4</sub> ] <sup>+</sup> (51), 248.0915 [C <sub>13</sub> H <sub>14</sub> NO <sub>4</sub> ] <sup>+</sup> (53), 203.0701 [C <sub>12</sub> H <sub>11</sub> O <sub>4</sub> ] <sup>+</sup> (81), 138.0551 [C <sub>7</sub> H <sub>8</sub> NO <sub>2</sub> ] <sup>+</sup> (68), 111.0443 [C <sub>6</sub> H <sub>7</sub> O <sub>2</sub> ] <sup>+</sup> (93), 89.0598 [C <sub>4</sub> H <sub>6</sub> O <sub>2</sub> ] <sup>+</sup> (100) | ?                                | 3,65      | -3,65        |
| 13                 | 318.2272 | 7.25     | 2,26      | C <sub>16</sub> H <sub>32</sub> NO <sub>5</sub> <sup>+</sup>               | 1.0              | 5.4            | n.f.                                                                                                                                                                                                                                                                                                                                                                                                                                                                                                                                                                                                                                                                                                                                                                                                   | ?                                | 3,60      | -3,60        |
| 14                 | 266.1385 | 3.82     | 1,89      | C <sub>14</sub> H <sub>20</sub> NO <sub>4</sub> <sup>+</sup>               | 0.6              | 4.7            | 224.1273 [C <sub>13</sub> H <sub>18</sub> NO <sub>3</sub> ] <sup>+</sup> (4), 206.1175 [C <sub>12</sub> H <sub>16</sub> NO <sub>2</sub> ] <sup>+</sup> (32), 188.1075 [C <sub>12</sub> H <sub>14</sub> NO] <sup>+</sup> (11), 159.0805 [C <sub>11</sub> H <sub>11</sub> O] <sup>+</sup> (7), 121.0647 [C <sub>8</sub> H <sub>6</sub> O] <sup>+</sup> (100)                                                                                                                                                                                                                                                                                                                                                                                                                                             | Anisomycin <sup>f</sup>          | 3,02      | -3,02        |
| 15                 | 237.2212 | 10.07    | 1,85      | C <sub>16</sub> H <sub>29</sub> O <sup>+</sup>                             | 0.2              | 1.7            | n.f.                                                                                                                                                                                                                                                                                                                                                                                                                                                                                                                                                                                                                                                                                                                                                                                                   | ?                                | -2,96     | 2,96         |
| 16                 | 408.2967 | 6.86     | 1,85      | C <sub>20</sub> H <sub>42</sub> NO <sub>7</sub> <sup>+</sup>               | -2.7             | 5.6            | n.f.                                                                                                                                                                                                                                                                                                                                                                                                                                                                                                                                                                                                                                                                                                                                                                                                   | ?                                | 2,96      | -2,95        |
| 17                 | 274.2014 | 8.12     | 1,83      | C <sub>14</sub> H <sub>28</sub> NO <sub>4</sub> <sup>+</sup>               | -0.3             | 4.8            | 256.1905 [C <sub>14</sub> H <sub>26</sub> NO <sub>3</sub> ] <sup>+</sup> (6), 238.1822 [C <sub>14</sub> H <sub>24</sub> NO <sub>3</sub> ] <sup>+</sup> (1), 155.1434 [C <sub>10</sub> H <sub>16</sub> O] <sup>+</sup> (6), 137.1326 [C <sub>10</sub> H <sub>15</sub> ] <sup>+</sup> (2), 120.0657 [C <sub>8</sub> H <sub>10</sub> NO <sub>3</sub> ] <sup>+</sup> (100), 102.0551 [C <sub>8</sub> H <sub>8</sub> NO <sub>2</sub> ] <sup>+</sup> (28), 74.0602 [C <sub>3</sub> H <sub>8</sub> NO] <sup>+</sup> (85), 56.0492 [C <sub>3</sub> H <sub>8</sub> N] <sup>+</sup> (11)                                                                                                                                                                                                                         | C10-HS (Homoserine)              | -2,91     | 2,91         |
| 18                 | 298.2020 | 8.05     | 1,80      | C <sub>16</sub> H <sub>28</sub> NO <sub>4</sub> <sup>+</sup>               | -0.8             | 16.7           | n.f.                                                                                                                                                                                                                                                                                                                                                                                                                                                                                                                                                                                                                                                                                                                                                                                                   | 3-oxo-C12-HSL                    | 2,87      | -2,87        |
| 19                 | 457.1655 | 7.81     | 1,75      | C <sub>29</sub> H <sub>21</sub> N <sub>4</sub> O <sub>2</sub> <sup>+</sup> | 1.0              | 4.6            | 427.1511 [C <sub>28</sub> H <sub>19</sub> N <sub>4</sub> O] <sup>+</sup> (1), 328.108 [C <sub>20</sub> H <sub>14</sub> N <sub>3</sub> O <sub>2</sub> ] <sup>+</sup> (2), 213.0659 [C <sub>12</sub> H <sub>8</sub> N <sub>3</sub> O <sub>2</sub> ] <sup>+</sup> (1), 145.1217 [C <sub>8</sub> H <sub>7</sub> O <sub>2</sub> ] <sup>+</sup> (2), 101.0595 [C <sub>5</sub> H <sub>4</sub> O <sub>2</sub> ] <sup>+</sup> (16), 89.0598 [C <sub>4</sub> H <sub>3</sub> O <sub>2</sub> ] <sup>+</sup> (13), 59.0493 [C <sub>3</sub> H <sub>2</sub> O] <sup>+</sup> (7)                                                                                                                                                                                                                                       | ?                                | 2,79      | -2,79        |
| 20                 | 549.2707 | 6.56     | 1,74      | C <sub>30</sub> H <sub>37</sub> N <sub>4</sub> O <sub>6</sub> <sup>+</sup> | 0.1              | 5.0            | 275.1387 [C <sub>15</sub> H <sub>10</sub> N <sub>3</sub> O <sub>2</sub> ] <sup>+</sup> (100), 247.1435 [C <sub>14</sub> H <sub>10</sub> N <sub>3</sub> O] <sup>+</sup> (2), 150.0914 [C <sub>8</sub> H <sub>12</sub> NO] <sup>+</sup> (7), 121.065 [C <sub>8</sub> H <sub>10</sub> O] <sup>+</sup> (6), 70.0651 [C <sub>4</sub> H <sub>8</sub> N] <sup>+</sup> (2)                                                                                                                                                                                                                                                                                                                                                                                                                                     | ?                                | 2,78      | -2,78        |
| 21                 | 517.2202 | 8.29     | 1,52      | C <sub>27</sub> H <sub>29</sub> N <sub>6</sub> O <sub>5</sub> <sup>+</sup> | -1.7             | 11.8           | 374.1608 [C <sub>24</sub> H <sub>20</sub> N <sub>6</sub> O <sub>2</sub> ] <sup>+</sup> (100), 307.0819 [C <sub>14</sub> H <sub>11</sub> N <sub>6</sub> O <sub>2</sub> ] <sup>+</sup> (4), 275.1141 [C <sub>13</sub> H <sub>10</sub> N <sub>6</sub> O <sub>2</sub> ] <sup>+</sup> (4), 147.1009 [C <sub>7</sub> H <sub>10</sub> O <sub>3</sub> ] <sup>+</sup> (2), 133.0857 [C <sub>6</sub> H <sub>10</sub> O <sub>3</sub> ] <sup>+</sup> (4), 103.039 [C <sub>7</sub> H <sub>11</sub> O] <sup>+</sup> (3), 89.0597 [C <sub>6</sub> H <sub>10</sub> O] <sup>+</sup> (7), 59.0493 [C <sub>3</sub> H <sub>7</sub> O] <sup>+</sup> (4)                                                                                                                                                                     | ?                                | -2,40     | 2,40         |

<sup>a</sup> Constructor statistical match factor (comparison of theoretical and experimental isotopic patterns). <sup>b</sup> n.d. : Not determined. <sup>c</sup> Vips n°4 and n°24 showed a similar MS/MS fragmentation pattern. <sup>d</sup> Vips n°8 and n°15 showed similar MS/MS fragment ions. <sup>e</sup> n.f. : Not fragmented. <sup>f</sup> Identification confirmed using a commercial standard.

|                             |    |    |   |   |   |
|-----------------------------|----|----|---|---|---|
| Normalized scaled intensity | -6 | -3 | 0 | 3 | 6 |
| Color code                  | -6 | -3 | 0 | 3 | 6 |

30 **Supplementary Table 3. Kinetic parameters of SsoPox W263I for C9-HSL, C10-HSL, C11-HSL, C12-HSL, 3-OH-C10-**  
 31 **HSL, 3-oxo-C10-HSL and 3-oxo-C12-HSL.**

| AHLs                              | C9-HSL      | C10-HSL     | C11-HSL     | C12-HSL    | 3-OH-C10-HSL | 3-oxo-C10-HSL | 3-oxo-C12-HSL              |
|-----------------------------------|-------------|-------------|-------------|------------|--------------|---------------|----------------------------|
| $k_{cat}$ ( $10^{-1} s^{-1}$ )    | 1.52 ± 0.07 | 0.90 ± 0.13 | 0.70 ± 0.12 | ND         | 1.03 ± 0.04  | 6.00 ± 0.90   | 18.0 ± 0.5                 |
| $K_M$ ( $\mu M$ )                 | 347 ± 46    | 664 ± 208   | 1030 ± 340  | ND         | 491 ± 48     | 1605 ± 443    | 17.8 ± 4.9                 |
| $k_{cat}/K_M$ ( $M^{-1}.s^{-1}$ ) | 439 ± 154   | 135 ± 60    | 68 ± 35     | ND         | 210 ± 83     | 374 ± 117     | $(101 \pm 28) \times 10^3$ |
| <b>Results from</b>               | This study  | This study  | This study  | This study | This study   | <sup>1</sup>  | <sup>1</sup>               |

ND: not detected

- 32 1. Hiblot, J., Gotthard, G., Elias, M. & Chabriere, E. Differential Active Site Loop Conformations  
 33 Mediate Promiscuous Activities in the Lactonase SsoPox. *PLoS One* **8**, e75272 (2013).

34

35

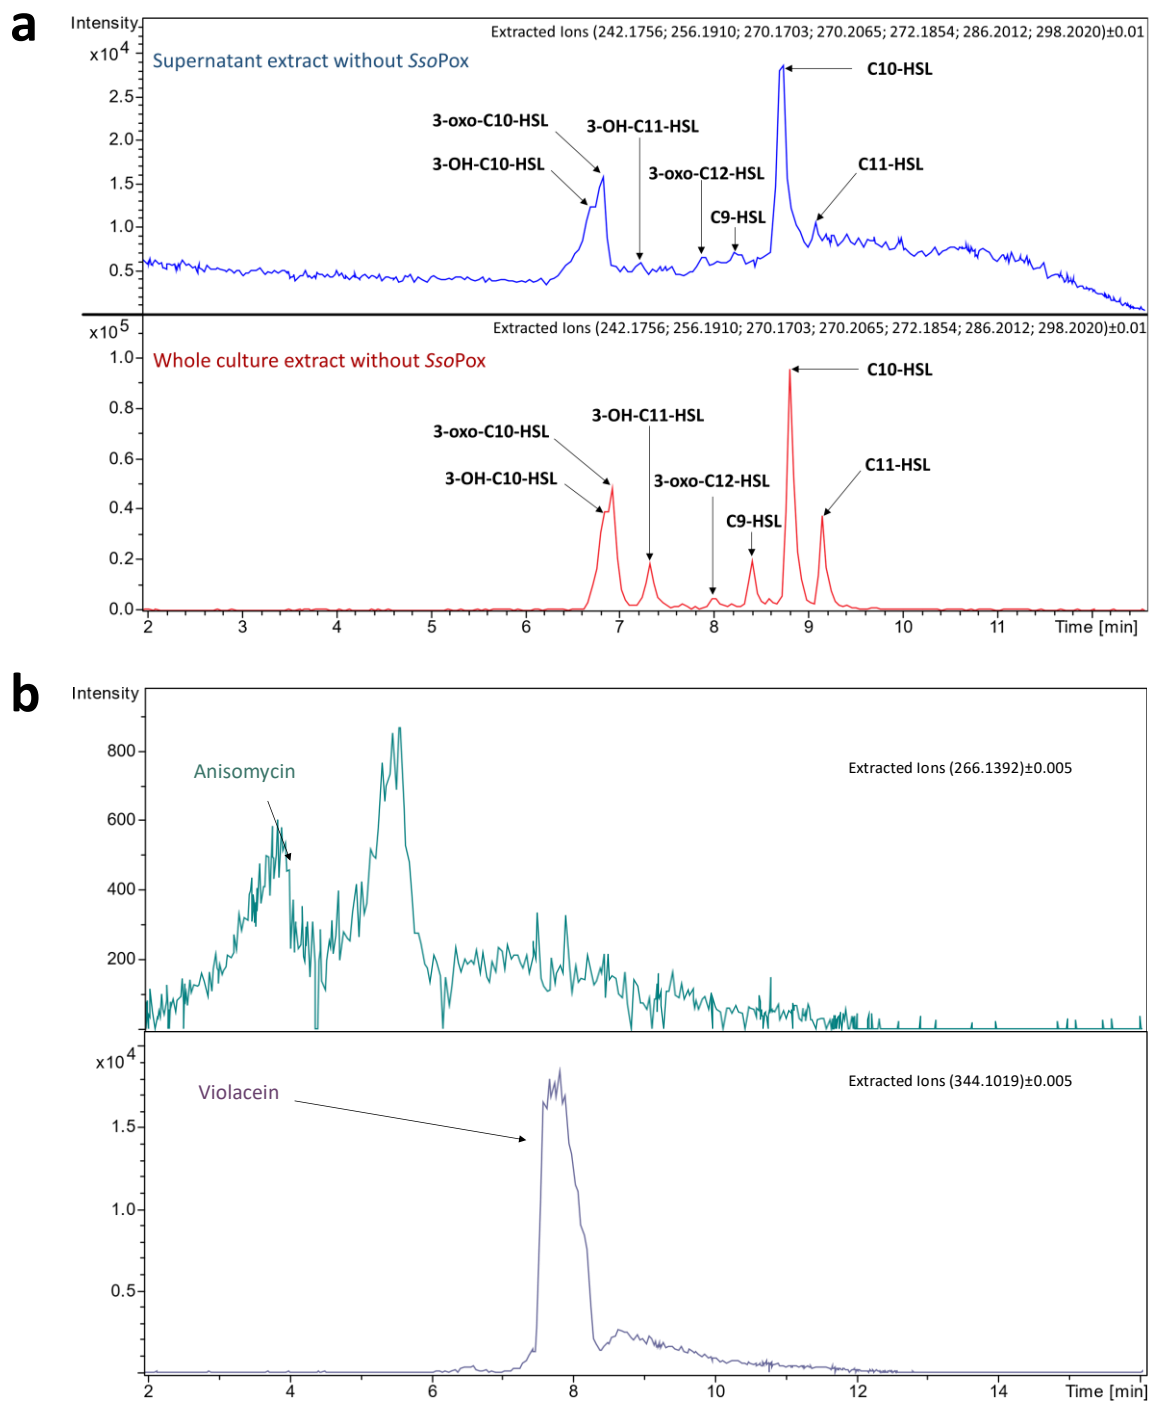

36

37

38 **Supplementary Figure 1. LC-MS extracted ion chromatograms of supernatant and whole culture extracts of**  
 39 **cultures of *C. violaceum* not treated with *SsoPox*. (a) Identification of HSL in whole culture and supernatant**  
 40 **extracts. (b) Identification of anisomycin and violacein in supernatant extracts.**



**a**

***Chromobacterium violaceum* ATCC 12472**

***Streptomyces hygrospinosus* ACCC40033**

| Gene    | Uniprot | Size, aa | Predicted function                           | Gene        | Size, aa | Predicted function                         | E-value | Query cover | Identities |
|---------|---------|----------|----------------------------------------------|-------------|----------|--------------------------------------------|---------|-------------|------------|
| CV_2255 | Q7NVT7  | 173      | Maltose O-acetyltransferase                  | <i>aniL</i> | 222      | O-acetyltransferase                        | 1E-32   | 92%         | 32%        |
| CV_2256 | Q7NVT6  | 412      | Acetylornithine aminotransferase ArgD        | <i>aniQ</i> | 441      | PLP-dependent aminotransferase             | 4E-81   | 94%         | 35%        |
| CV_2257 | Q7NVT5  | 555      | Transketolase domain-containing protein      | <i>aniP</i> | 603      | Transketolase                              | 4E-84   | 94%         | 35%        |
| CV_2258 | Q7NVT4  | 281      | Probable short-chain dehydrogenase           | <i>aniN</i> | 275      | NAD(P)-dependent short-chain dehydrogenase | 1E-76   | 95%         | 43%        |
| CV_2259 | Q7NVT3  | 198      | Uncharacterized protein                      | <i>aniM</i> | 208      | Hypothetical protein                       | 2E-25   | 93%         | 36%        |
| CV_2260 | Q7NVT2  | 261      | S6PP domain-containing protein               | <i>aniH</i> | 255      | Hypothetical protein                       | 0.0005  | 62%         | 24%        |
| CV_2261 | Q7NVT1  | 341      | Probable acetylserotonin O-methyltransferase | <i>aniK</i> | 331      | SAM-dependent O-methyltransferase          | 8E-31   | 96%         | 28%        |
| CV_2262 | Q7NVT0  | 434      | MFS transporter                              | <i>aniL</i> | 393      | MFS transporter                            | 1.7     | 18%         | 33%        |
|         |         |          |                                              | <i>aniO</i> | 462      | Glycosyltransferase                        |         |             |            |
|         |         |          |                                              | <i>aniG</i> | 577      | $\alpha$ -glucosidase                      |         |             |            |
|         |         |          |                                              | <i>aniF</i> | 208      | LuxR family transcriptional regulator      |         |             |            |
|         |         |          |                                              | <i>aniJ</i> | 291      | Putative phosphatase                       |         |             |            |

**b**

***S. hygrospinosus* ACCC40033**

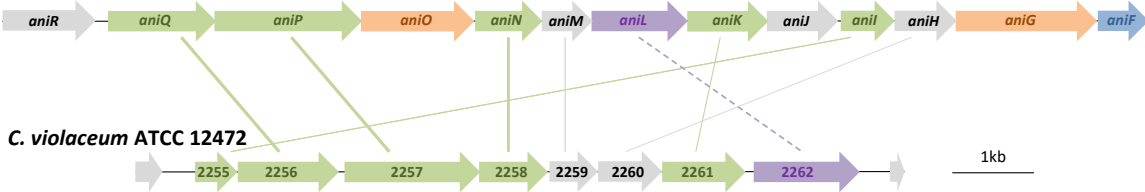

49

50 **Supplementary Figure 3. Identification of anisomycin biosynthesis gene cluster in *C. violaceum* ATCC 12472**

51 **and comparison with *Streptomyces hygrospinosus* ACCC40033.** (a) Blast comparisons of proteins involved in

52 anisomycin biosynthesis between *C. violaceum* and *S. hygrospinosus*. Genes written in green have been

53 previously shown to be necessary for the full anisomycin biosynthesis from *L*-tyrosine in *S. hygrospinosus*; genes

54 written in orange are those being involved in the glycosylation and deglycosylation steps of anisomycin and its

55 intermediates; genes written in grey have not been shown as being involved in the anisomycin biosynthesis; aniF

56 (blue) is involved in the anisomycin regulation and aniL (purple) codes for a transporter 1. (b) Comparison of *S.*

57 *hygrospinosus* and *C. violaceum* gene cluster organizations. Full lines indicate sequence identities as revealed by

58 Blast analyses and thickness of the lines represents E-values. The dashed line indicates a similar function without

59 any sequence homology.

60



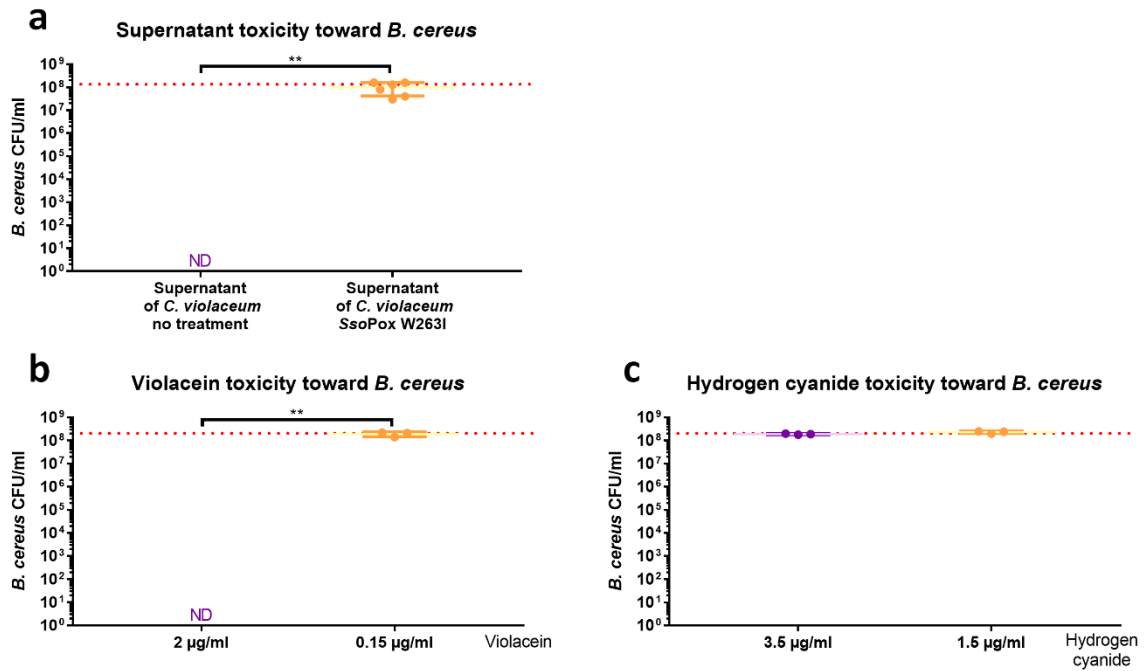

61

62 **Supplementary Figure 4. Effect of *C. violaceum* supernatant, violacein and hydrogen cyanide on the growth of**  
 63 ***B. cereus*.** Mean bacterial concentration in CFU.ml<sup>-1</sup> of *B. cereus* after 8 hours of culture in the presence of 50%  
 64 of supernatant from treated cultures of *C. violaceum* with 0.5 mg ml<sup>-1</sup> SsoPox W263I (yellow bar) or untreated  
 65 cultures as negative controls (purple bar) (a) and in the presence of violacein (b) and hydrogen cyanide (c) in  
 66 quantity equivalent to the one in 50% of supernatant from treated cultures of *C. violaceum* with 0.5 mg ml<sup>-1</sup>  
 67 SsoPox W263I (yellow bar) or in untreated cultures (purple bar). Error bars represent the standard deviations of  
 68  $n = 6$  experiments (3 biological replicates  $\times$  2 technical replicates) or  $n = 3$  biological replicates, each represented  
 69 by one point. \*\* $p$ -values < 0.01 according to Student's  $t$ -test. ND: Not detected. Dotted red line represents the  
 70 mean bacterial concentration of *B. cereus* with 50% of culture medium alone.

71

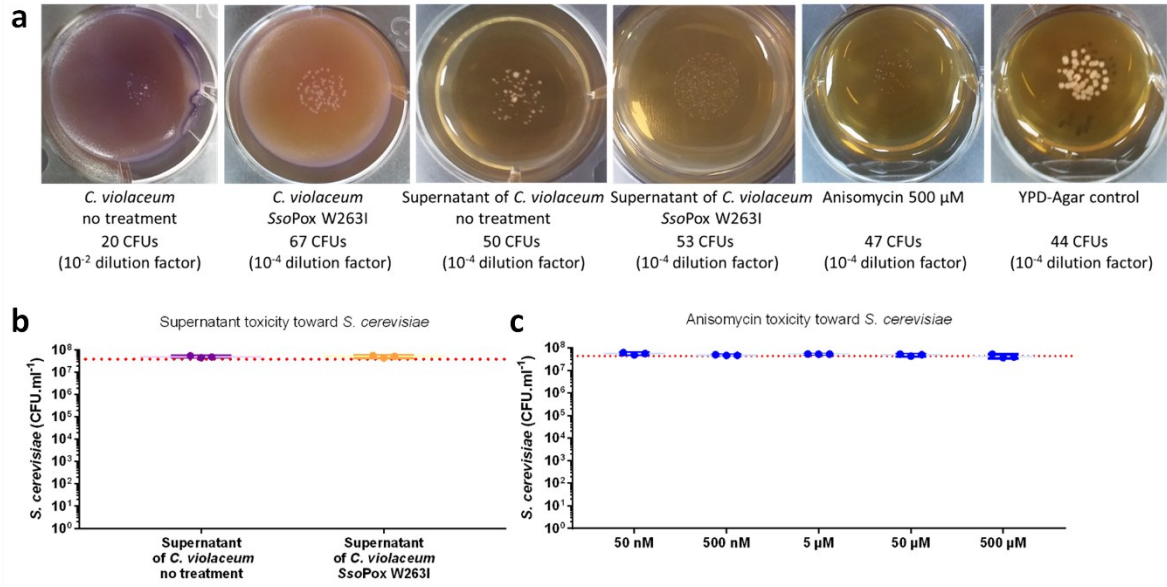

72

73 **Supplementary Figure 5. *C. violaceum* and anisomycin impact on colony size and growth of *S. cerevisiae*. (a)**

74 Representative pictures of colony formation of *S. cerevisiae* after 24 h at 30°C from left to right : on YPD-Agar

75 infected by untreated *C. violaceum* (dilution factor at 10<sup>-2</sup>), on YPD-Agar infected by *C. violaceum* treated with

76 0.5 mg.ml<sup>-1</sup> SsoPox W263I (dilution factor at 10<sup>-4</sup>), on YPD-Agar containing 50% of supernatant of untreated *C.*

77 *violaceum* (dilution factor at 10<sup>-4</sup>), on YPD-Agar containing 50% of supernatant of *C. violaceum* treated with

78 0.5 mg.ml<sup>-1</sup> SsoPox W263I (dilution factor at 10<sup>-4</sup>), on YPD-Agar containing 500 μM of anisomycin (dilution factor

79 at 10<sup>-4</sup>), on YPD-Agar for control (dilution factor at 10<sup>-4</sup>). Pictures are representative of n = 3 independent

80 replicates. (b) Mean yeast concentration in CFU.ml<sup>-1</sup> of *S. cerevisiae* after 24 hours growth on YPD-agar containing

81 50% of supernatant from treated cultures of *C. violaceum* with 0.5 mg ml<sup>-1</sup> SsoPox W263I (yellow bar) or

82 untreated cultures as negative controls supernatant (purple bar). Error bars represent the standard deviations

83 of n = 3 biological replicates. Dotted red line represents the mean yeast concentration of *S. cerevisiae* on YPD-

84 Agar only. (c) Mean yeast concentration in CFU.ml<sup>-1</sup> of *S. cerevisiae* after 24 hours growth on YPD-agar containing

85 anisomycin at concentrations ranging from 50 nM to 500 μM. Error bars represent the standard deviations of

86 n = 3 biological replicates. Dotted red line represents the mean yeast concentration of *S. cerevisiae* on YPD-Agar

87 only.

88

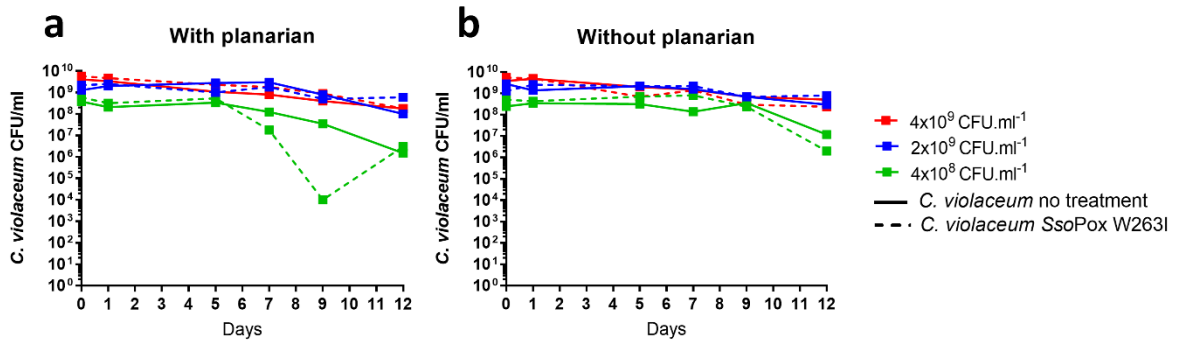

89

90 **Supplementary Figure 6. Evolution of bacterial concentration of *C. violaceum* with and without planarian over**  
 91 **time.** Bacterial concentration in CFU.ml<sup>-1</sup> of *C. violaceum* treated with 0.5 mg.ml<sup>-1</sup> SsoPox W263I (full line) and  
 92 untreated cultures (dotted line) in well containing planarians (a) and well without worm (b).

93

94

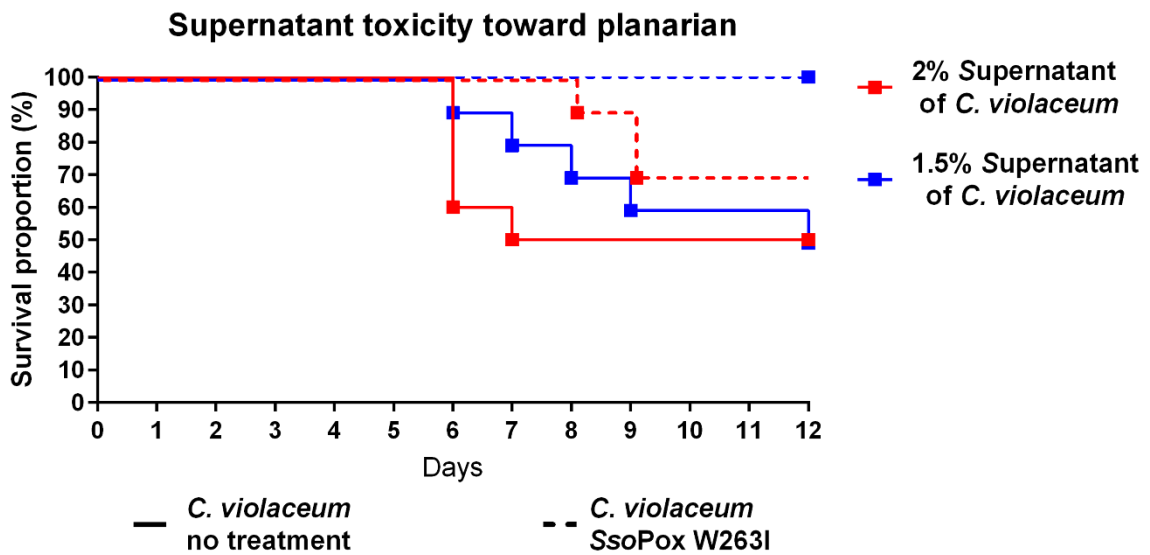

95

96 **Supplementary Figure 7. Planarian survival in the presence of supernatants of *C. violaceum* treated with 0.5**  
 97 **mg.ml<sup>-1</sup> SsoPox W263I (dotted line) and untreated cultures as negative controls (full line) at 2% (v/v in tap water)**  
 98 **(red) and 1.5% (v/v in tap water) (blue). Curves represent survival proportions of 10 planarians. According to log-**  
 99 **rank (Mantel-Cox) test comparing survival curves in treated and untreated conditions  $p$ -value = 0.2294 for 2% of**  
 100 **supernatant and  $p$ -value = 0.0115 for 1.5% of supernatant.**

101

102

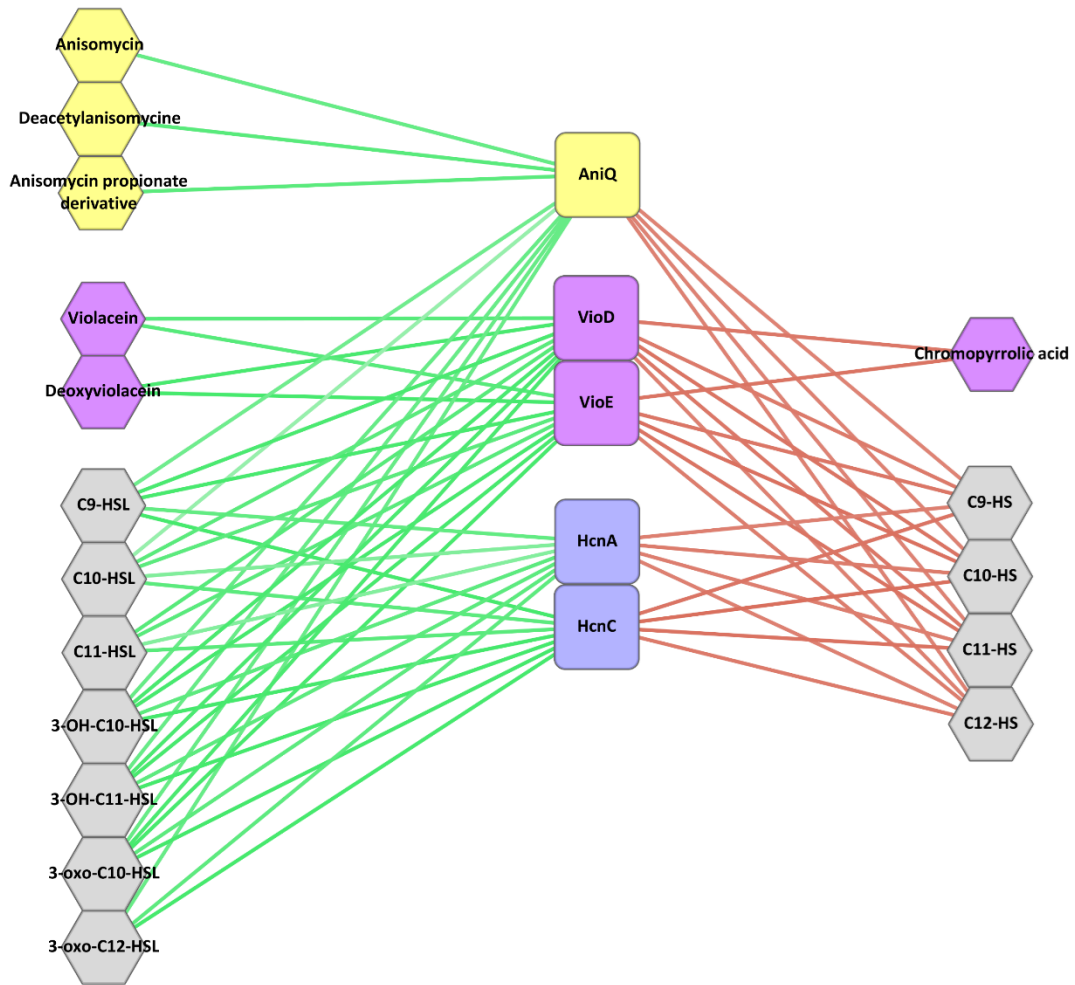

103

104 **Supplementary Figure 8. *SsoPox* impacts jointly the biosynthesis of toxic metabolites and the production of**  
 105 **AHLs.** Multi-omics correlation network between AHLs (grey), their hydrolyzed form HSLs (grey) and molecules  
 106 involved in anisomycin (yellow), violacein (purple) and hydrogen cyanide (blue) production.

107
